# Supplementary material
Source: PubMed Central journal article supplement (PMC1160161)
Supplement: nar_33_suppl-2_W710__1.pdf [file nar_33_suppl-2_W710__1.pdf]

## EMMA-GenDB Integration

There are several entry points in EMMA which lead to sequence information in GenDB. The first one uses the search function on the welcome page:

- On the BRIGEP entry page click the 'Jump to *EMMA*' button
- On the EMMA welcome page, locate the search bar at the top
- Enter 'smc' in the search field and click the '*Search*' button
- In the search result list click on one of the links named '*Smc...*'
- The '*Sequence Viewer*' page will appear
- Under: '*Latest annotation (from GenDB)*' you can see the annotation assigned to this sequence in GenDB.
- Following one of the links under '*View in GenDB*' a GenDB-window will be opened showing the details of the corresponding sequence.
- *Contig View* shows the gene location within its contig (in this case the S. *meliloti* chromosome)
- *Jump to region* will display the corresponding region
- *View annotation* will open a window with details of the functional annotation of that region

The EMMA sequence viewer is linked wherever a sequence is encountered, e.g. from a data sheet.

- From the portal enter EMMA
- On the welcome page click '*Browse/Analyse an existent experiment*'
- Click on the number besides '*Transformed Datasets*'
- Check the checkbox for the dataset named '*Significance Test*'
- Click '*Show*' This opens a new window with the dataset
- Click on one of the row names under *Reporter Identifier*
- A window will open showing information about the reporter
- From there you can directly go to GenDB via '-> *GenDB*' or go to the sequence viewer and proceed as stated above
