# Supplementary material
Source: PubMed Central journal article supplement (PMC1160161)
Supplement: nar_33_suppl-2_W710__2.pdf [file nar_33_suppl-2_W710__2.pdf]

## ProDB-GenDB Integration

The integration of ProDB and GenDB was already implemented in a bidirectional fashion. Please follow the steps below:

### Defining a new organism:

- On the BRIGEP entry page click on '*Jump to ProDB*' button
- Select '*Base Items Management*' from the Actions menu at the left
- Select a '*Organism*' from the Base Items menu at the left
- define the organism and press '*Create*' to store it

### Linking to GenDB (Importing sequence data):

- Click on '*Experiment selection*' (only after creating a new organism)
- Select '*Sequence Data*' from the Actions menu
- Choose the organism from the drop down box on the top for the organism
- Choose a GenDB Project from the GenDB Project menu on the right and activate it
- Select at least one contig that you'd like to import into ProDB
- Click on '*Import*' and wait ;-)

### Direct annotation of spots:

- Choose an experiment group from the experiment Groups drop down box
- Go to '*Experiment Selection*' via the Actions menu
- Choose an Experiment from the Experiments list
- Select '*Gel Data*' from the Actions menu
- Select '*Spot Annotation*' from the Actions menu
- Move the mouse over a spot with a blue circle (spots with green circles are annotated)
- Press the right button of the mouse
- Select '*Assign Protein*'
- Insert a Region Name and press the '*Assign protein*' button
- Press the reload button of your browser
- After annotating a spot you can open a menu by clicking with the left mouse button on an annotated spot highlighted in green
- You can jump to the GenDB contig view by pressing '*Jump to GenDB Contig View*'

### Jumping from GenDB to ProDB:

- On the BRIGEP entry page click on '*Jump to GenDB*' button

- Left click the small '*ProDB*' icon on a gene, indicating experimental evidence from a 2D gel analysis
- Click on '*2D Gel*' to open the ProDB 2D gel page, the corresponding spot will be highlighted by a red square
- Click on '*Experiment*' to open the ProDB experiment overview page
